# Supplementary material for: The Role of ZNF143 in Breast Cancer Cell Survival Through the NAD(P)H Quinone Dehydrogenase 1–p53–Beclin1 Axis Under Metabolic Stress
Source: PubMed Central journal article supplement (PMC6523662; doi:10.3390/cells8040296), 2019-03-30
Supplement: cells-08-00296-s001.pdf [file cells-08-00296-s001.pdf]

1 Article

2 **A role of ZNF143 on cell survival through the**  
 3 **NAD(P)H quinone dehydrogenase 1-p53-Beclin1 axis**  
 4 **under metabolic stress in breast cancer cells**

5 A Rome Paek<sup>1</sup>, Ji Young Mun<sup>2</sup>, Mun Jeong Jo<sup>1</sup>, Hyosun Choi<sup>3</sup>, Yun Jeong Lee<sup>3</sup>, Heesun  
 6 Cheong<sup>4,5</sup>, Jae Kyung Myung<sup>4</sup>, Dong Wan Hong<sup>6</sup>, Jongkeun Park<sup>6</sup>, Kyung-Hee Kim<sup>7</sup> and Hye  
 7 Jin You<sup>1,4,\*</sup>

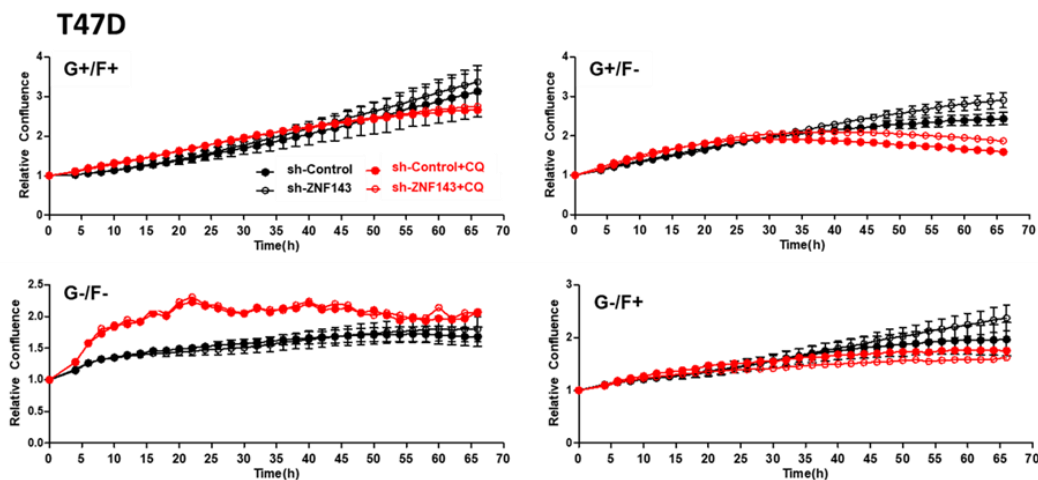

*Paek AR et al Supplementary Fig. S1*

8 **Supplementary Figure S1.** Cells were plated on 96-well plates and grown for 24 h. The cells  
 9 were then maintained in four different conditions in terms of FBS and glucose, and cell  
 10 survival or growth was monitored by capturing images every 2 h over 4 days. Cells were  
 11 maintained in the presence of 10  $\mu$ M chloroquine. Relative confluency is shown in the  
 12 graphs. Data are expressed as means  $\pm$  S. E. of at least three independent experiments.  
 13 Statistical significance was assessed using paired Student's t-tests (\* $p < 0.05$  and \*\* $p < 0.005$ ).  
 14 Results shown are representative of at least three independent experiments.

15

16 **Supplementary Table S1.** Primers for PCR

| Gene     | Primers (5'-3')           | Reference     | Product (bp) |
|----------|---------------------------|---------------|--------------|
| p53-F    | CCCCTCCTGGCCCCTGTCATCTTC  | NM001126118.1 | 265bp        |
| p53-R    | GCAGCGCCTCACAACTCCGTCAT   |               |              |
| ZNF143-F | CAGCATTCCATACTGCCTCA      | NM003442      | 141bp        |
| ZNF143-R | GAGATGGCTGTTCTCCAAGC      |               |              |
| NQO1-F   | ATTTTGCTCCAAGCAGCCTC      | NM000903.2    | 141bp        |
| NQO1-R   | GGTTGTCAGTTGGGATGGACT     |               |              |
| GAPDH-F  | GGGTGTGAACCATGAGAAGT      | NM33197.1     | 136bp        |
| GAPDH-R  | GACTGTGGTCATGAGTCCT       |               |              |
| PTGR1-F  | CGCCAAAAAGCTCTGAAGGAC     | NM001146108.1 | 152bp        |
| PTGR1-R  | CATGCTTTCACCTATTGTCTTCCCC |               |              |
| KYNU-F   | GTCTCATGTAGAGGAGCGGG      | NM003937.2    | 139bp        |
| KYNU-R   | AGGAACTGGAGCCACTCGAA      |               |              |

17

18

**Supplementary Table S2.** Altered proteins by ZNF143 knockdown in MCF7 cells

| Gene Symbol       | Description                                                                         |
|-------------------|-------------------------------------------------------------------------------------|
| GSTP1             | Glutathione S-transferase P [OS=Homo sapiens]                                       |
| LDHB              | L-lactate dehydrogenase B chain [OS=Homo sapiens]                                   |
| S100A6            | protein S100-A6 [OS=Homo sapiens]                                                   |
| ALDH1A1           | Retinal dehydrogenase 1 [OS=Homo sapiens]                                           |
| GFPT2             | Glutamine--fructose-6-phosphate aminotransferase [isomerizing] 2 [OS=Homo sapiens]  |
| AKR1C3            | Aldo-keto reductase family 1 member C3 [OS=Homo sapiens]                            |
| FBXO17            | F-box only protein 17 [OS=Homo sapiens]                                             |
| TOP1MT            | DNA topoisomerase I, mitochondrial [OS=Homo sapiens]                                |
| AKR1C1            | aldo-keto reductase family 1 member C1 [OS=Homo sapiens]                            |
| BAG2              | BAG family molecular chaperone regulator 2 [OS=Homo sapiens]                        |
| VN1R5             | Vomer nasal type-1 receptor 5 [OS=Homo sapiens]                                     |
| RAB19             | Isoform 2 of Ras-related protein Rab-19 [OS=Homo sapiens]                           |
| SCIN              | ADSEVERIN [OS=Homo sapiens]                                                         |
| C15orf26; CFAP161 | Isoform 2 of Cilia- and flagella-associated protein 161 [OS=Homo sapiens]           |
| IFNK              | Interferon kappa [OS=Homo sapiens]                                                  |
| HBA2; HBA1        | Hemoglobin subunit alpha [OS=Homo sapiens]                                          |
| MAN1A1            | Mannosyl-oligosaccharide 1,2-alpha-mannosidase IA [OS=Homo sapiens]                 |
| NQO1              | NAD(P)H dehydrogenase [quinone] 1 [OS=Homo sapiens]                                 |
| TF                | Serotransferrin [OS=Homo sapiens]                                                   |
| ADAMTS19          | A disintegrin and metalloproteinase with thrombospondin motifs 19 [OS=Homo sapiens] |
| KYNU              | kynureninase [OS=Homo sapiens]                                                      |
| ALB               | Serum albumin [OS=Homo sapiens]                                                     |
| AK1               | Adenylate kinase isoenzyme 1 [OS=Homo sapiens]                                      |
| LACTB             | Serine beta-lactamase-like protein LACTB, mitochondrial [OS=Homo sapiens]           |
| LXN               | Latexin [OS=Homo sapiens]                                                           |
| ANXA1             | annexin A1 [OS=Homo sapiens]                                                        |
| SBF1              | Isoform 4 of Myotubularin-related protein 5 [OS=Homo sapiens]                       |
| TMOD2             | Tropomodulin-2 [OS=Homo sapiens]                                                    |
| APOA1             | Apolipoprotein A-I [OS=Homo sapiens]                                                |
| UTP23             | rRNA-processing protein UTP23 homolog [OS=Homo sapiens]                             |
| AFP               | Alpha-fetoprotein [OS=Homo sapiens]                                                 |
| PTGR1             | Prostaglandin reductase 1 [OS=Homo sapiens]                                         |
| FKBP11            | Peptidyl-prolyl cis-trans isomerase FKBP11 [OS=Homo sapiens]                        |
| MYO1B             | Unconventional myosin-Ib [OS=Homo sapiens]                                          |
| PLOD2             | Isoform 2 of Procollagen-lysine,2-oxoglutarate 5-dioxygenase 2 [OS=Homo sapiens]    |
| GNA13             | Guanine nucleotide-binding protein subunit alpha-13 [OS=Homo sapiens]               |
| CD44              | CD44 antigen [OS=Homo sapiens]                                                      |
| SCARB1            | Scavenger receptor class B member 1 [OS=Homo sapiens]                               |
| CCDC37; CFAP100   | Isoform 2 of Cilia- and flagella-associated protein 100 [OS=Homo sapiens]           |
| SFXN5             | Sideroflexin-5 [OS=Homo sapiens]                                                    |

|                  |                                                                                      |
|------------------|--------------------------------------------------------------------------------------|
| MPI              | mannose-6-phosphate isomerase [OS=Homo sapiens]                                      |
| CKM              | Creatine kinase M-type [OS=Homo sapiens]                                             |
| SP3              | transcription factor Sp3 [OS=Homo sapiens]                                           |
| AUP1             | Ancient ubiquitous protein 1 [OS=Homo sapiens]                                       |
| CLDN3            | Claudin-3 [OS=Homo sapiens]                                                          |
| RCN1             | Reticulocalbin-1 [OS=Homo sapiens]                                                   |
| PPIF             | Peptidyl-prolyl cis-trans isomerase F, mitochondrial [OS=Homo sapiens]               |
| GNA11            | guanine nucleotide-binding protein subunit alpha-11 [OS=Homo sapiens]                |
| ATP8             | ATP synthase protein 8 [OS=Homo sapiens]                                             |
| FABP5            | Fatty acid-binding protein, epidermal [OS=Homo sapiens]                              |
| NAT1             | Arylamine N-acetyltransferase 1 [OS=Homo sapiens]                                    |
| FBXO3            | F-box only protein 3 [OS=Homo sapiens]                                               |
| AHSG             | Alpha-2-HS-glycoprotein [OS=Homo sapiens]                                            |
| A2M              | alpha-2-macroglobulin [OS=Homo sapiens]                                              |
| CCDC175          | Coiled-coil domain-containing protein 175 [OS=Homo sapiens]                          |
| MDN1             | Midasin [OS=Homo sapiens]                                                            |
| PTRHD1           | Putative peptidyl-tRNA hydrolase PTRHD1 [OS=Homo sapiens]                            |
| HEBP1            | Heme-binding protein 1 [OS=Homo sapiens]                                             |
| ITIH4            | Inter-alpha-trypsin inhibitor heavy chain H4 [OS=Homo sapiens]                       |
| CBX1             | Chromobox protein homolog 1 [OS=Homo sapiens]                                        |
| DYNLT1           | Dynein light chain Tctex-type 1 [OS=Homo sapiens]                                    |
| LTF              | Lactotransferrin [OS=Homo sapiens]                                                   |
| HMGN3            | High mobility group nucleosome-binding domain-containing protein 3 [OS=Homo sapiens] |
| CYB5R1           | NADH-cytochrome b5 reductase 1 [OS=Homo sapiens]                                     |
| MYO5A            | Isoform 3 of Unconventional myosin-Va [OS=Homo sapiens]                              |
| WDR45B; WDR45L   | WD repeat domain phosphoinositide-interacting protein 3 [OS=Homo sapiens]            |
| NCOA6            | Nuclear receptor coactivator 6 [OS=Homo sapiens]                                     |
| CBX2             | Chromobox protein homolog 2 [OS=Homo sapiens]                                        |
| C1orf198         | Uncharacterized protein C1orf198 [OS=Homo sapiens]                                   |
| CRELD1           | Isoform 2 of Cysteine-rich with EGF-like domain protein 1 [OS=Homo sapiens]          |
| DTL              | Denticleless protein homolog [OS=Homo sapiens]                                       |
| FLNB             | Filamin-B [OS=Homo sapiens]                                                          |
| KLRG2            | killer cell lectin-like receptor subfamily G member 2 [OS=Homo sapiens]              |
| C17orf104; MEIOC | Meiosis-specific coiled-coil domain-containing protein MEIOC [OS=Homo sapiens]       |
| NEBL             | Isoform 2 of Nebulette [OS=Homo sapiens]                                             |
| CTSL2; CTSV      | Cathepsin L2 [OS=Homo sapiens]                                                       |
| ARL3             | ADP-ribosylation factor-like protein 3 [OS=Homo sapiens]                             |
| PLS3             | Plastin-3 [OS=Homo sapiens]                                                          |
| C6orf211; ARMT1  | protein-glutamate O-methyltransferase [OS=Homo sapiens]                              |
| RAB31            | ras-related protein rab-31 [OS=Homo sapiens]                                         |
| SSFA2            | Sperm-specific antigen 2 [OS=Homo sapiens]                                           |
| FAM102A          | Protein FAM102A [OS=Homo sapiens]                                                    |
| RILPL1           | RILP-like protein 1 [OS=Homo sapiens]                                                |

|                               |                                                                                                        |
|-------------------------------|--------------------------------------------------------------------------------------------------------|
| NPDC1                         | Neural proliferation differentiation and control protein 1 [OS=Homo sapiens]                           |
| IDH3A                         | Isoform 2 of Isocitrate dehydrogenase [NAD] subunit alpha, mitochondrial [OS=Homo sapiens]             |
| CALU                          | Isoform 4 of Calumenin [OS=Homo sapiens]                                                               |
| SERPINA3                      | Alpha-1-antichymotrypsin [OS=Homo sapiens]                                                             |
| PFN3                          | Profilin-3 [OS=Homo sapiens]                                                                           |
| HOMER3                        | homer protein homolog 3 [OS=Homo sapiens]                                                              |
| LGALS1                        | Galectin-1 [OS=Homo sapiens]                                                                           |
| SLC39A7                       | Zinc transporter SLC39A7 [OS=Homo sapiens]                                                             |
| TBL1XR1                       | F-box-like/WD repeat-containing protein TBL1XR1 [OS=Homo sapiens]                                      |
| B4GALT1                       | Beta-1,4-galactosyltransferase 1 [OS=Homo sapiens]                                                     |
| ABL1                          | Isoform IB of Tyrosine-protein kinase ABL1 [OS=Homo sapiens]                                           |
| CRIP2                         | Cysteine-rich protein 2 [OS=Homo sapiens]                                                              |
| GSKIP                         | GSK3-beta interaction protein [OS=Homo sapiens]                                                        |
| CTSD                          | Cathepsin D [OS=Homo sapiens]                                                                          |
| CRAT                          | Carnitine O-acetyltransferase [OS=Homo sapiens]                                                        |
| MGLL                          | monoglyceride lipase [OS=Homo sapiens]                                                                 |
| IRF2BP2                       | Isoform 2 of Interferon regulatory factor 2-binding protein 2 [OS=Homo sapiens]                        |
| IFT140                        | Intraflagellar transport protein 140 homolog [OS=Homo sapiens]                                         |
| EPB41L2                       | band 4.1-like protein 2 [OS=Homo sapiens]                                                              |
| SLC25A24                      | Calcium-binding mitochondrial carrier protein SCaMC-1 [OS=Homo sapiens]                                |
| SDSL                          | serine dehydratase-like [OS=Homo sapiens]                                                              |
| RALGAPA2                      | Ral GTPase-activating protein subunit alpha-2 [OS=Homo sapiens]                                        |
| BMP2K                         | BMP-2-inducible protein kinase [OS=Homo sapiens]                                                       |
| SORT1                         | Sortilin [OS=Homo sapiens]                                                                             |
| TNRC6B                        | Trinucleotide repeat-containing gene 6B protein [OS=Homo sapiens]                                      |
| LOC550643;<br>LINC01420; NBDY | negative regulator of P-body association [OS=Homo sapiens]                                             |
| GREB1                         | Protein GREB1 [OS=Homo sapiens]                                                                        |
| NT5C2                         | Cytosolic purine 5'-nucleotidase [OS=Homo sapiens]                                                     |
| ZNHIT2                        | Zinc finger HIT domain-containing protein 2 [OS=Homo sapiens]                                          |
| AGR2                          | Anterior gradient protein 2 homolog [OS=Homo sapiens]                                                  |
| CALU                          | Isoform 3 of Calumenin [OS=Homo sapiens]                                                               |
| ZRSR1                         | U2 small nuclear ribonucleoprotein auxiliary factor 35 kDa subunit-related protein 1 [OS=Homo sapiens] |
| SLITRK6                       | SLIT and NTRK-like protein 6 [OS=Homo sapiens]                                                         |
| EML2                          | Isoform 3 of Echinoderm microtubule-associated protein-like 2 [OS=Homo sapiens]                        |
| CHRDL1                        | Isoform 4 of Chordin-like protein 1 [OS=Homo sapiens]                                                  |
| CTSB                          | Cathepsin B [OS=Homo sapiens]                                                                          |
| CLIC3                         | Chloride intracellular channel protein 3 [OS=Homo sapiens]                                             |
| ULK1                          | Serine/threonine-protein kinase ULK1 [OS=Homo sapiens]                                                 |
| RAB6C                         | Ras-related protein Rab-6C [OS=Homo sapiens]                                                           |
| LEPREL4; P3H4                 | synaptonemal complex protein SC65 [OS=Homo sapiens]                                                    |
| BNIP3                         | BCL2/adenovirus E1B 19 kDa protein-interacting protein 3 [OS=Homo sapiens]                             |

|                         |                                                                                      |
|-------------------------|--------------------------------------------------------------------------------------|
| RPS6KA3                 | Ribosomal protein S6 kinase alpha-3 [OS=Homo sapiens]                                |
| ARMCX2                  | Armadillo repeat-containing X-linked protein 2 [OS=Homo sapiens]                     |
| EPS8L1                  | Epidermal growth factor receptor kinase substrate 8-like protein 1 [OS=Homo sapiens] |
| NINJ1                   | ninjurin-1 [OS=Homo sapiens]                                                         |
| ANXA6                   | annexin A6 [OS=Homo sapiens]                                                         |
| RAET1G                  | Retinoic acid early transcript 1G protein [OS=Homo sapiens]                          |
| NCEH1                   | Isoform 2 of Neutral cholesterol ester hydrolase 1 [OS=Homo sapiens]                 |
| PDXDC1;<br>LOC102724985 | Pyridoxal-dependent decarboxylase domain-containing protein 1 [OS=Homo sapiens]      |
| TMEM120A                | Transmembrane protein 120A [OS=Homo sapiens]                                         |
| GLT8D1                  | Glycosyltransferase 8 domain-containing protein 1 [OS=Homo sapiens]                  |
| SLC3A2                  | Isoform 4 of 4F2 cell-surface antigen heavy chain [OS=Homo sapiens]                  |
| DAP                     | Death-associated protein 1 [OS=Homo sapiens]                                         |
| ARFGAP3                 | ADP-ribosylation factor GTPase-activating protein 3 [OS=Homo sapiens]                |
| DAAM1                   | Disheveled-associated activator of morphogenesis 1 [OS=Homo sapiens]                 |
| CKAP4                   | Cytoskeleton-associated protein 4 [OS=Homo sapiens]                                  |
| ASMTL                   | N-acetylserotonin O-methyltransferase-like protein [OS=Homo sapiens]                 |
| LMCD1                   | LIM and cysteine-rich domains protein 1 [OS=Homo sapiens]                            |
| SLC7A5                  | large neutral amino acids transporter small subunit 1 [OS=Homo sapiens]              |
| SCD                     | acyl-CoA desaturase [OS=Homo sapiens]                                                |
| CHMP4C                  | Charged multivesicular body protein 4c [OS=Homo sapiens]                             |
| ACSL1                   | Long-chain-fatty-acid--CoA ligase 1 [OS=Homo sapiens]                                |
| ITGA5                   | Integrin alpha-5 [OS=Homo sapiens]                                                   |
| SLC2A1                  | Solute carrier family 2, facilitated glucose transporter member 1 [OS=Homo sapiens]  |
| EVL                     | Isoform 1 of Ena/VASP-like protein [OS=Homo sapiens]                                 |
| CBFA2T3                 | Protein CBFA2T3 [OS=Homo sapiens]                                                    |
| FAM114A1                | Protein Noxp20 [OS=Homo sapiens]                                                     |
| ZNF185                  | zinc finger protein 185 [OS=Homo sapiens]                                            |
| CA2                     | Carbonic anhydrase 2 [OS=Homo sapiens]                                               |
| TIMP1                   | Metalloproteinase inhibitor 1 [OS=Homo sapiens]                                      |
| CALML5                  | Calmodulin-like protein 5 [OS=Homo sapiens]                                          |
| ARMCX1                  | Armadillo repeat-containing X-linked protein 1 [OS=Homo sapiens]                     |
| SH3BGRL                 | SH3 domain-binding glutamic acid-rich-like protein [OS=Homo sapiens]                 |
| HSPB8                   | Heat shock protein beta-8 [OS=Homo sapiens]                                          |
| EMP2                    | Epithelial membrane protein 2 [OS=Homo sapiens]                                      |
| LRRC6                   | protein tilB homolog [OS=Homo sapiens]                                               |
| ABAT                    | 4-aminobutyrate aminotransferase, mitochondrial [OS=Homo sapiens]                    |
| CA8                     | carbonic anhydrase-related protein [OS=Homo sapiens]                                 |
| FOSL2                   | Fos-related antigen 2 [OS=Homo sapiens]                                              |
| KIAA1324                | UPF0577 protein KIAA1324 [OS=Homo sapiens]                                           |
| ARMCX3                  | Armadillo repeat-containing X-linked protein 3 [OS=Homo sapiens]                     |
| ASS1                    | Argininosuccinate synthase [OS=Homo sapiens]                                         |
| MUC1                    | Isoform 2 of Mucin-1 [OS=Homo sapiens]                                               |

|                  |                                                            |
|------------------|------------------------------------------------------------|
| CRABP1           | Cellular retinoic acid-binding protein 1 [OS=Homo sapiens] |
| SUSD2            | Sushi domain-containing protein 2 [OS=Homo sapiens]        |
| GOLM1            | Golgi membrane protein 1 [OS=Homo sapiens]                 |
| LYPD3            | Ly6/PLAUR domain-containing protein 3 [OS=Homo sapiens]    |
| ASPH             | Aspartyl/Asparaginyl beta-hydroxylase [OS=Homo sapiens]    |
| TFF3             | Trefoil factor 3 [OS=Homo sapiens]                         |
| TFF1             | Trefoil factor 1 [OS=Homo sapiens]                         |
| ADIRF; C10orf116 | Adipogenesis regulatory factor [OS=Homo sapiens]           |
| VIM              | Vimentin [OS=Homo sapiens]                                 |
| SLC26A2          | sulfate transporter [OS=Homo sapiens]                      |
| MUC5B            | Mucin-5B [OS=Homo sapiens]                                 |

---
